# Supplementary material
Source: HighWire-hosted journal article supplement (https://bmjopenquality.bmj.com/highwire/filestream/144635/field_highwire_adjunct_files/1/bmjoq-2021-001743supp002_data_supplement.pdf)
Supplement: bmjoq-2021-001743supp002_data_supplement.pdf [file bmjoq-2021-001743supp002_data_supplement.pdf]

|    | A   | B            | C                    | D                   | E      | F         | G         | H         | I         | J     | K     | L     | M     | N     | O  | P    | Q  | R    | S        |
|----|-----|--------------|----------------------|---------------------|--------|-----------|-----------|-----------|-----------|-------|-------|-------|-------|-------|----|------|----|------|----------|
| 1  |     |              |                      | Drug Round Lunch    |        | Midday    |           |           |           |       |       |       |       |       |    |      |    |      |          |
| 2  |     |              |                      | Supper              |        | 5pm       |           |           |           |       |       |       |       |       |    |      |    |      | 00:20:00 |
| 3  |     |              |                      |                     |        |           |           |           |           |       |       |       |       |       |    |      |    |      | 62       |
| 4  | LRI | WD           | IDU                  | Infectious Diseases | ESM    | Emergency | Emergency | 18        | 18        | 08:30 | 08:50 | 08:50 | 09:10 | 00:40 | 18 | 100% | 18 | 100% | 08:30    |
| 5  | LRI | WD           | 38                   | Win L6              | ESM    | Emergency | Emergency | 28        | 28        | 08:30 | 08:50 | 08:50 | 09:30 | 01:00 | 28 | 100% | 28 | 100% | 28       |
| 6  | LRI | WD           | 36                   | Win L6              | ESM    | Emergency | Emergency | 28        | 28        | 08:30 | 09:10 | 09:10 | 09:50 | 01:20 | 28 | 100% | 28 | 100% | 16       |
| 7  | H   | omptom Suite | LRI                  | WD                  | 37     | Win L6    | ESM       | Emergency | Emergency | 09:30 | 09:30 | 09:30 | 10:10 | 01:20 | 24 | 100% | 24 | 100% |          |
| 8  | LRI | WD           | 22                   | Bal 6               | ESM    | Inpatient | Inpatient | 24        | 24        | 08:50 | 09:30 | 09:30 | 10:10 | 01:00 | 27 | 96%  | 25 | 89%  |          |
| 9  | LRI | WD           | 33                   | Win L5              | ESM    | Inpatient | Inpatient | 28        | 28        | 09:30 | 10:10 | 09:50 | 10:30 | 01:00 | 28 | 100% | 26 | 93%  |          |
| 10 | LRI | WD           | 31                   | Win L5              | ESM    | Emergency | Emergency | 30        | 30        | 09:50 | 10:30 | 10:10 | 10:50 | 01:00 | 28 | 93%  | 22 | 73%  |          |
| 11 | LRI | WD           | 15                   | Bal L5              | ESM    | Emergency | Emergency | 29        | 29        | 10:10 | 10:50 | 10:30 | 11:10 | 01:00 | 22 | 76%  | 8  | 28%  |          |
| 12 | LRI | WD           | 7                    | Bal L3              | ESM    | Emergency | Emergency | 30        | 28        | 10:30 | 10:50 | 10:50 | 11:30 | 01:00 | 28 | 93%  | 3  | 10%  |          |
| 13 | LRI | AMU          |                      | AMU                 | ESM    | Emergency | Emergency | 33        | 33        | 10:30 | 11:30 | 11:10 | 11:50 | 01:20 | 20 | 61%  | 0  | 0%   |          |
| 14 | LRI | WD           | ACB                  | ACB beds            | ESM    | Emergency | Emergency | 10        | 10        | 11:10 | 11:30 | 11:30 | 11:50 | 00:40 | 8  | 80%  | 3  | 30%  |          |
| 15 | LRI | AFU          |                      | Geriatric Medicine  | ESM    | Emergency | Emergency | 16        | 16        | 11:10 | 11:30 | 11:30 | 12:10 | 01:00 | 5  | 31%  | 0  | 0%   |          |
| 16 | LRI | WD           | Elderly Frailty Unit | EFU                 | ESM    | Emergency | Emergency | 18        | 18        | 11:10 | 11:50 | 11:50 | 12:10 | 01:00 | 2  | 11%  | 0  | 0%   |          |
| 17 | LRI | WD           | 34                   | Win L5              | ESM    | Emergency | Emergency | 26        | 26        | 11:30 | 12:10 | 12:10 | 12:30 | 01:00 | 0  | 0%   | 0  | 0%   |          |
| 18 | LRI | WD           | 30                   | Win L4              | ESM    | Emergency | Emergency | 29        | 29        | 11:50 | 12:30 | 12:10 | 12:50 | 01:00 | 0  | 0%   | 0  | 0%   |          |
| 19 | LRI | WD           | 29                   | Win L4              | ESM    | Emergency | Emergency | 29        | 29        | 12:10 | 12:50 | 12:30 | 13:10 | 01:00 | 0  | 0%   | 0  | 0%   |          |
| 20 |     |              |                      |                     |        |           |           |           |           |       |       |       |       |       |    |      |    |      |          |
| 21 | LRI | R42          | Modular Build        | Gastroenterology    | CHUGGS | Emergency | Emergency | 28        | 28        | 13:10 | 13:50 | 13:30 | 14:10 | 01:00 | 0  | 0%   | 0  | 0%   |          |
| 22 | LRI | R43          | Modular Build        | Gastroenterology    | CHUGGS | Emergency | Emergency | 28        | 28        | 13:30 | 14:10 | 13:50 | 14:30 | 01:00 | 0  | 0%   | 0  | 0%   |          |
| 23 | LRI | WD           | 26                   | Win L3              | ESM    | Emergency | Emergency | 18        | 18        | 13:50 | 14:10 | 14:10 | 14:30 | 00:40 | 0  | 0%   | 0  | 0%   |          |
| 24 | LRI | WD           | 25                   | Win L3              | ESM    | Emergency | Emergency | 20        | 20        | 13:50 | 14:30 | 14:30 | 14:50 | 01:00 | 0  | 0%   | 0  | 0%   |          |
| 25 | LRI | WD           | 24                   | Win L3              | ESM    | Emergency | Emergency | 27        | 27        | 14:10 | 14:50 | 14:30 | 15:10 | 01:00 | 0  | 0%   | 0  | 0%   |          |
| 26 | LRI | WD           | 23                   | Win L3              | ESM    | Emergency | Emergency | 29        | 29        | 14:30 | 15:10 | 14:50 | 15:30 | 01:00 | 0  | 0%   | 0  | 0%   |          |
